# Supplementary material
Source: PubMed Central journal article supplement (PMC8241290)
Supplement: mmc1.pdf [file mmc1.pdf]

# THE LANCET Microbe

## Supplementary appendix

This appendix formed part of the original submission and has been peer reviewed.  
We post it as supplied by the authors.

Supplement to: Bekliz M, Adea K, Essaidi-Laziosi M. SARS-CoV-2 rapid diagnostic tests for emerging variants. *Lancet Microbe* 2021; published online June 29.  
[https://doi.org/10.1016/S2666-5247\(21\)00147-6](https://doi.org/10.1016/S2666-5247(21)00147-6)

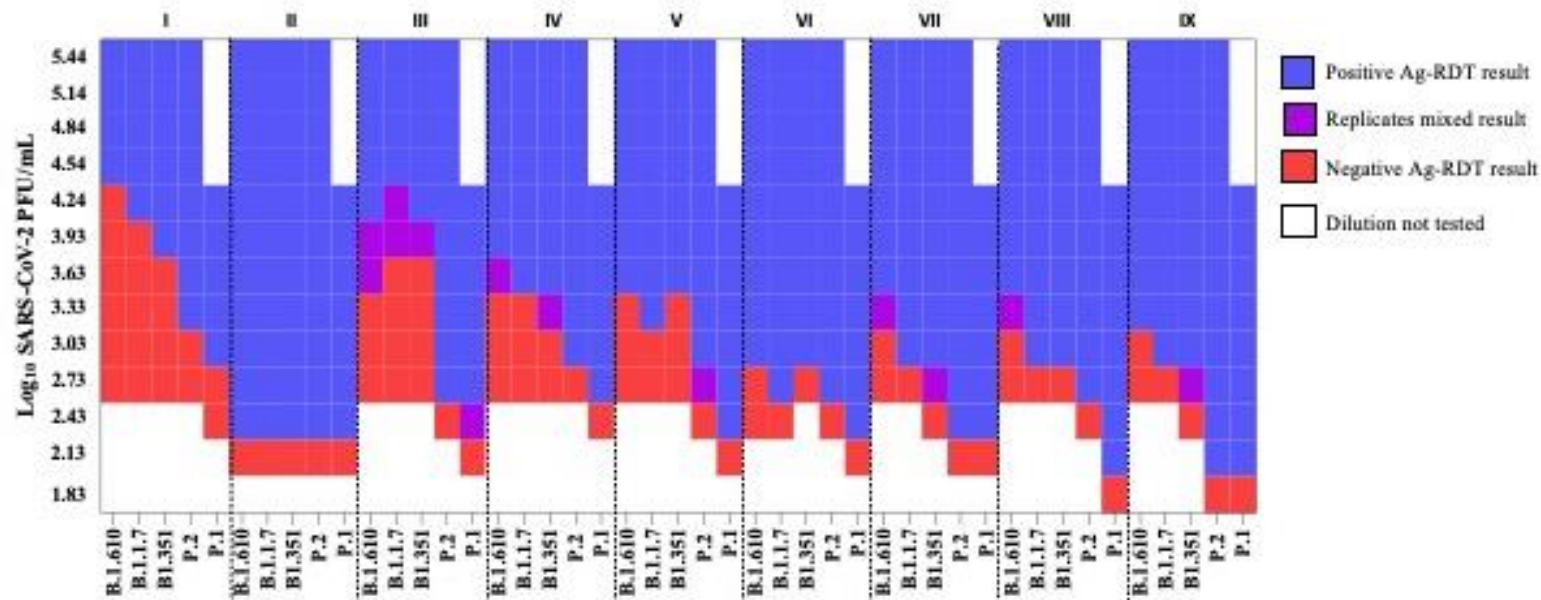

**Figure:**

Heat map of analytical sensitivity of nine Ag-RDTs assays with SARS-CoV-2 variants of concern B.1.1.7., B.1.351, P.1 and variant of interest P.2 in comparison to an early-pandemic SARS-CoV-2 isolate (B.1.610), based on Log<sub>10</sub> PFU/mL. Ag-RDTs used were I) Genedia COVID-19 Ag (Green Cross Medical Science Corp); II) Sure Status (Premier Medical Corporation); III) Joysbio SARS-CoV-2 Antigen Rapid Test Kit (Joysbio); IV) Edinburgh Genetics (Edinburgh); V) 2019-nCoV Antigen test (Wondfo), VI); Standard Q COVID-19 Ag (SD Biosensor/Roche); VII) Panbio COVID-19 Ag Rapid test device (Abbott); VIII) NowCheck Covid-19 Ag test (Bionote) and IX) Ichroma Covid-19 Ag (Boditech). All Ag-RDTs are based on detection of the nucleocapsid protein of SARS-CoV-2.
